# Supplementary material
Source: PubMed Central journal article supplement (PMC3494389)
Supplement: cr2012122x3.pdf [file cr2012122x3.pdf]

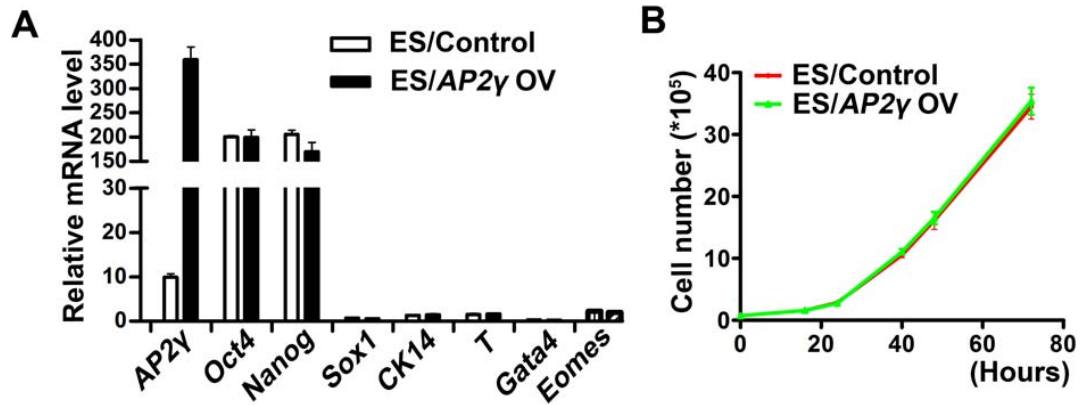

**Supplementary information, Figure S3** *AP2γ* overexpression has no impact on the pluripotency and the proliferation rates of ESCs.

(A) qRT-PCR analysis of pluripotency markers (Oct4 and Nanog) and differentiation markers in control and *AP2γ* overexpressin ESCs.

(B) The proliferation rate of the control or *AP2γ* overexpressing ESCs was examined by counting at different time points.
