# Supplementary material
Source: PubMed Central journal article supplement (PMC3494389)
Supplement: cr2012122x5.pdf [file cr2012122x5.pdf]

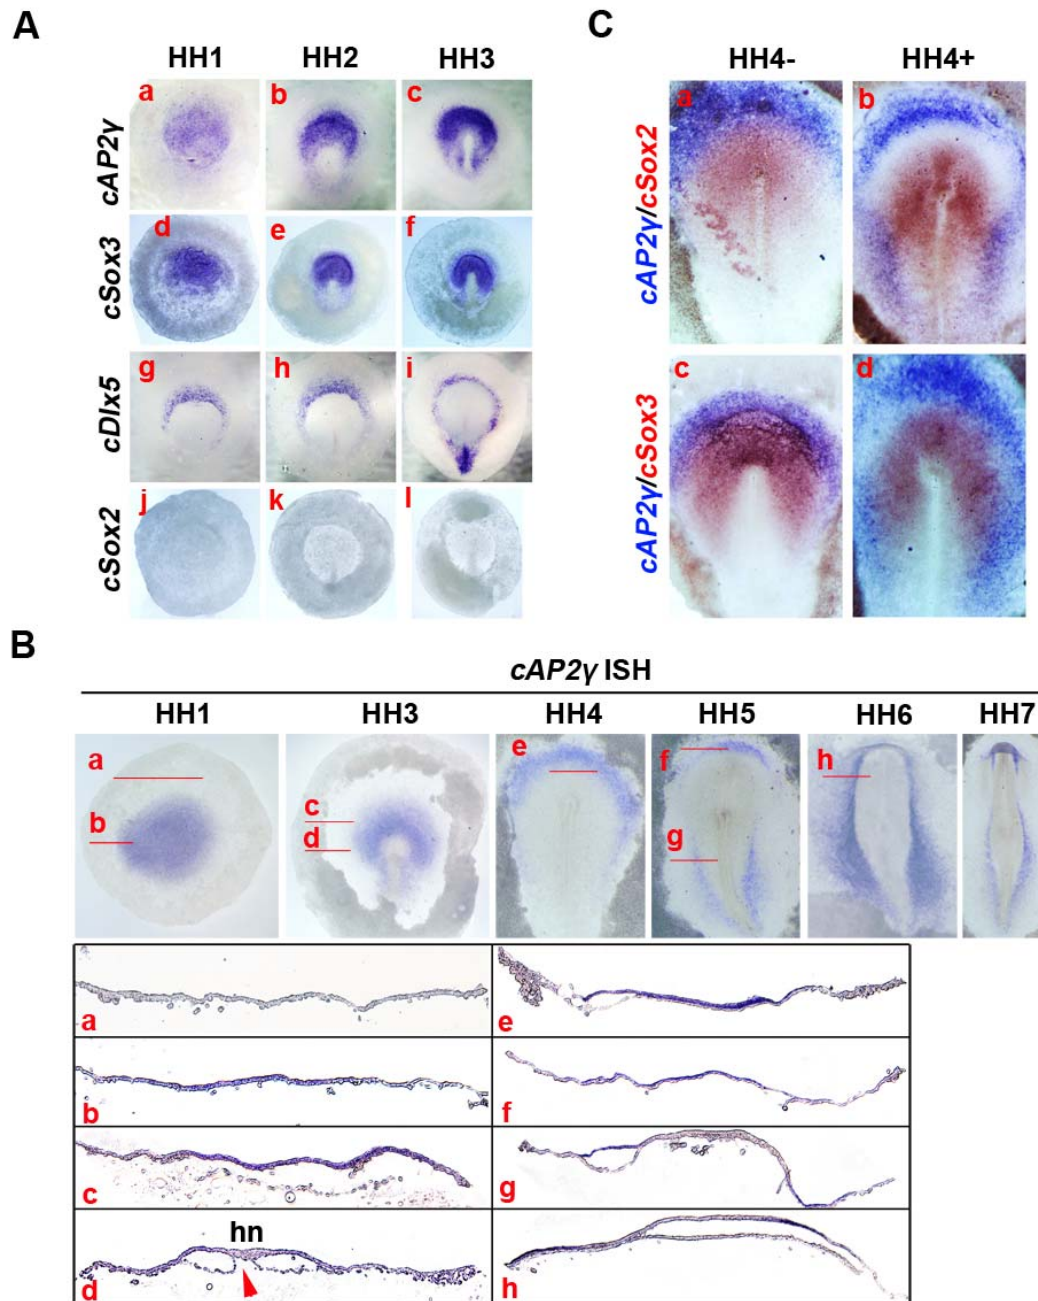

**Supplementary information, Figure S5** The section of *cAP2γ* stained chick embryos.

(A) Expression of *cAP2γ*, *cSox3*, *cDlx5* and *cSox2* is shown by whole-mount ISH using digoxigenin-labelled riboprobes from HH stage 1 to stage 3 chick embryos.

(B) Expression of *cAP2γ* was shown by whole-mount ISH from HH stage 1 to stage 7 chick embryos. Some stained embryos were sectioned as the indicated region (red line). The arrow indicated region in d is Hensen's node (hn).

(C) Double whole-mount hybridization of *cAP2γ* and *cSox3*, *cTcfap2c* and *cSox2* with digoxigenin (DIG)-labelled riboprobes (*cAP2γ*, blue) and fluorescein isothiocyanate (FITC)-labeled riboprobe (*cSox3* and *cSox2*, red) in early or late HH stage 4 chick embryos.
