# Supplementary material
Source: PubMed Central journal article supplement (PMC3494389)
Supplement: cr2012122x6.pdf [file cr2012122x6.pdf]

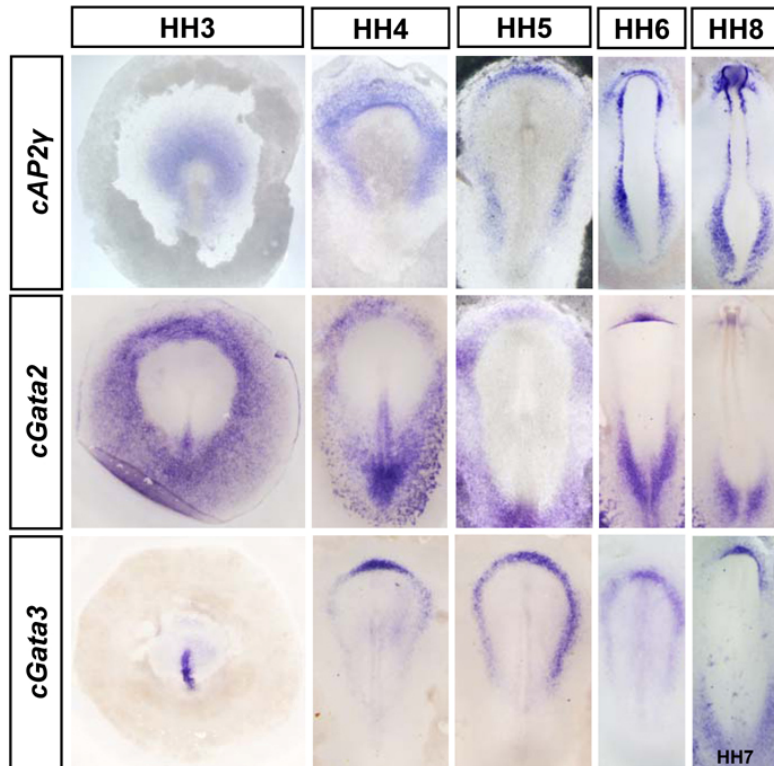

**Supplementary information, Figure S6** Comparative expression pattern of epidermal markers.

Expression of *cAP2 $\gamma$* , *cGata2*, *cGata3* is shown by whole-mount ISH using digoxigenin-labelled riboprobes from HH stage 3 to stage 8 chick embryos.
