# Supplementary material
Source: PubMed Central journal article supplement (PMC3494389)
Supplement: cr2012122x8.pdf [file cr2012122x8.pdf]

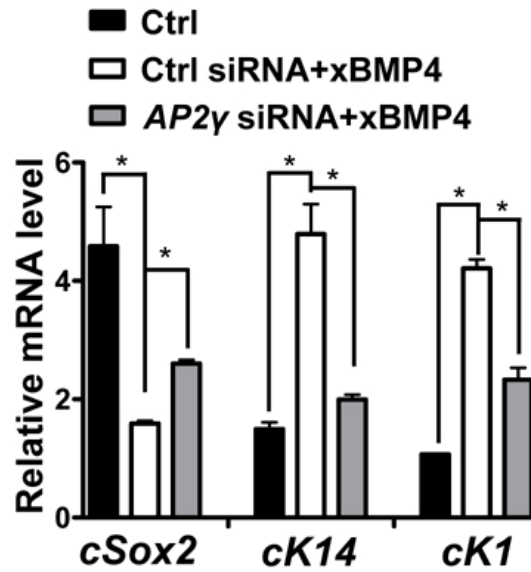

**Supplementary information, Figure S8** BMP4 effects on ectodermal patterning were partially impaired by AP2 $\gamma$  siRNA.

One side of HH stage 3 embryos were widely electroporated with control (ctrl) siRNA alone, or co-electroporated with control or AP2 $\gamma$  siRNA (50 ng/ $\mu$ l) and xBMP4 (0.3  $\mu$ g/ $\mu$ l). The embryos were cultured to HH stage 5 and the whole embryos were collected for Q-PCR analysis of *cSox2*, *cK14* (*cKer14*) and *cK1*.
