# Supplementary material
Source: PubMed Central journal article supplement (PMC3494389)
Supplement: cr2012122x9.pdf [file cr2012122x9.pdf]

**A**

| P19 cells               | N2B27/Aggragation 3h |   |   |   |     |   |    |    |   |    |     |
|-------------------------|----------------------|---|---|---|-----|---|----|----|---|----|-----|
| DMSO                    | -                    | + | + |   |     |   |    |    |   |    |     |
| BMP4 (10ng/ml)          | -                    | - | + | + | +   | + | +  | +  | + | +  | +   |
| Dorsomorphin ( $\mu$ M) |                      |   |   |   | 0.5 | 2 | 10 | 20 |   |    |     |
| SB431542 ( $\mu$ M)     |                      |   |   |   |     |   |    |    |   | 10 |     |
| Noggin (nM)             |                      |   |   |   |     |   |    |    |   |    | 100 |
| Lane                    | 1                    | 2 | 3 | 4 | 5   | 6 | 7  | 8  | 9 | 10 | 11  |

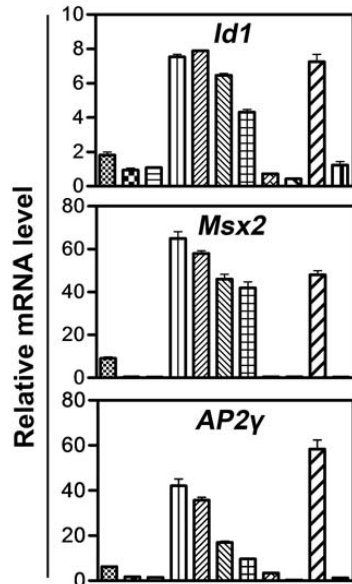**B**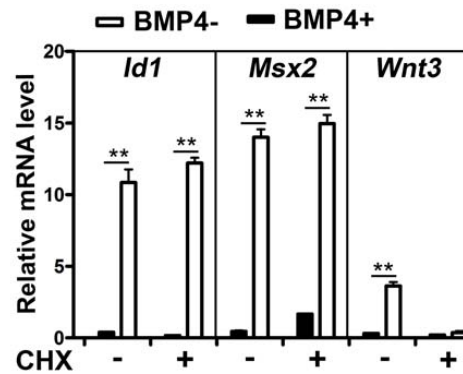**C**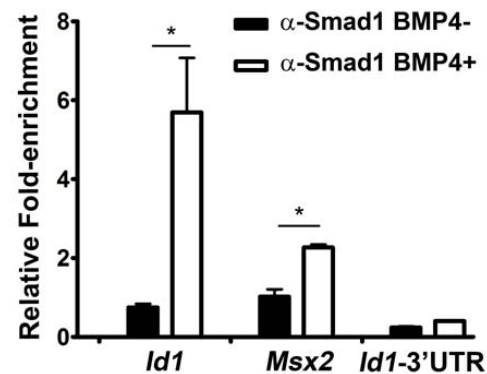

**Supplementary information, Figure S9** *AP2γ* might be directly regulated by BMP4.

(A) qRT-PCR analysis of *AP2γ*, *Id1* and *Msx2* expression in BMP4 (10 ng/ml) and its antagonist treated P19 cells in N2B27 serum free medium. BMPR1a inhibitor dorsomorphin, Noggin (served as positive control) and SB431542 (TGF $\beta$  inhibitor, served as negative control) were added to the medium 30 minutes prior to BMP4 treatment to block BMP signaling activity dose-dependently as indicated concentrations. DMSO group served as control. The cells were continuously cultured for 2.5 hours and subjected to analysis.

(B) qRT-PCR analysis of *Id1*, *Msx2*, and *Wnt3* expression following the culture condition in Fig. 7B. n.s, non-significant.

(C) The ChIP analysis for known Smad1 binding sites on *Id1* and *Msx2* promoter region following the condition in Fig. 7E. The primer for *Id1-3'UTR* served as negative control.
