# Supplementary material
Source: PubMed Central journal article supplement (PMC3494389)
Supplement: cr2012122x12.pdf [file cr2012122x12.pdf]

**Supplementary information, Table S1** ShRNA sequences

| Name                                       | Sequences                  |
|--------------------------------------------|----------------------------|
| Control shRNA in ESCs                      | 5'-CTTGTGAAGCTTCTAGGAG-3'  |
| Mouse <i>AP2<math>\gamma</math></i> shRNA1 | 5'-GCGGTGGCTGACTATTTAA-3'  |
| Mouse <i>AP2<math>\gamma</math></i> shRNA4 | 5'-GTCTAATACCCCATATTTTC-3' |
| Control siRNA                              | 5'-CGTACGCGGAATACTTCGA-3'  |
| Chick <i>AP2<math>\gamma</math></i> siRNA  | 5'-GCTGCAAATGTGACACTAT-3'  |
