# Supplementary material
Source: PubMed Central journal article supplement (PMC3494389)
Supplement: cr2012122x13.pdf [file cr2012122x13.pdf]

**Supplementary information, Table S2** Primer sequences (5' → 3') for cloning

| Name                                    | 5' primers                                           | 3' primers                                       |
|-----------------------------------------|------------------------------------------------------|--------------------------------------------------|
| Mouse <i>AP2γ</i> cloning               | CGGGAATTCGGACGCCATGTTGTG<br>GAAAATA                  | CGGGGATCCTGCAGCCATTTACTT<br>CCTGTG               |
| Chick <i>AP2γ</i> cloning               | CCGTCTAGAATGTTGTGGAACTG<br>GCAGA TAACGT              | CCGCTCGAGCCTTTACTTCCTGTGC<br>TTGTCCATT           |
| Chick <i>AP2γ</i> probe<br>cloning      | CCGGGTACCTGTGCTCCGAAGAG<br>CCAAATCTA                 | CCGCTCGAGCCTTTACTTCCTGTGC<br>TTGTCCATT           |
| Chick <i>Keratin14</i><br>probe cloning | AGCGTGGAGGCCGACATCAA                                 | TGCTCCTCCACGCTGGTGAT                             |
| Mouse <i>AP2γ</i><br>promoter cloning-1 | GGGGTACCGTGGAAGCCTAGTAC<br>CCTAGA (start from -3847) | CGGAGATCTTATTTTCCACAACATGG<br>CGTCC (end at +12) |
| Mouse <i>AP2γ</i><br>promoter cloning-2 | CGGGTACCAGCCTGGTAAAGTCAA<br>GGGTT (start from -3516) | CGGAGATCTTATTTTCCACAACATGG<br>CGTCC (end at +12) |
