# Supplementary material
Source: PubMed Central journal article supplement (PMC3494389)
Supplement: cr2012122x14.pdf [file cr2012122x14.pdf]

**Supplementary information, Table S3** Primer sequences (5'→3') for Q-PCR and RT-PCR

| Genes                               | 5' primers              | 3' primers              |
|-------------------------------------|-------------------------|-------------------------|
| <i>Oct4</i>                         | CAGAAGAGGATCACCTTGGG    | GTGAGTGATCTGCTGTAGGG    |
| <i>Nanog</i>                        | TTGCTTACAAGGGTCTGCTACT  | ACTGGTAGAAGAATCAGGGCT   |
| <i>Tcfap2a</i>                      | GAAGACTGCGAGGACCGTC     | GAAGTCGGCATTAGGGGTGTG   |
| <i>AP2<math>\gamma</math></i>       | ATCCCTCACCTCTCCTCTCC    | CCAGATGCGAGTAATGGTCGG   |
| <i>GAPDH</i>                        | TGAAGCAGGCATCTGAGGG     | CGAAGGTGGAAGAGTGGGAG    |
| <i>Sox1</i>                         | GCACACAGCGTTTTCTCGG     | ACATCCGACTCCTCTTCCC     |
| <i>Nestin</i>                       | CCCTGAAGTCGAGGAGCTG     | CTGCTGCACCTCTAAGCGA     |
| <i>CK1</i>                          | CTGTCTGTTCCCCTAGTGGC    | GTCCGGGTTGTGGTGTCTAC    |
| <i>CK14</i>                         | AGCGGCAAGAGTGAGATTTCT   | CCTCCAGGTATTCTCCAGGG    |
| <i>CK18</i>                         | CAGCCAGCGTCTATGCAGG     | CTTTCTCGGTCTGGATTCCAC   |
| <i>Id1</i>                          | TCTACGACATGAACGGCTGCTA  | ACTCCGAGTTCAGCTCCAGCA   |
| <i>Msx2</i>                         | AAGGCGAAAAGACTGCAAGAG   | GCAGGGGTGAGTTGATAGGG    |
| <i>T (brachyury)</i>                | CTCGGATTCACATCGTGAGAG   | AAGGCTTTAGCAAATGGGTTGTA |
| <i>Flk1</i>                         | GGGTCGATTTCAAACCTCAATGT | AGAGTAAAGCCTATCTCGCTGT  |
| <i>Gata4</i>                        | CCCTACCCAGCCTACATGG     | ACATATCGAGATTGGGGTGTCT  |
| <i>Gata6</i>                        | TTGCTCCGGTAACAGCAGTG    | GTGGTCGCTTGTGTAGAAGGA   |
| <i>Emoes</i>                        | CCTGGTGGTGTTTTGTTGTG    | TTTAATAGCACCGGGCACTC    |
| <i>Cdx2</i>                         | GCTACGGCGAACTTGGACA     | GTGATGGTGCGCGTGGTAT     |
| <i>Pax6</i>                         | GCAGATGCAAAAAGTCCAGGTG  | CAGGTTGCGAAGAACTCTGTTT  |
| <i>Chick Keratin1</i>               | GGATGGCATCATTGAAGAAGTC  | ACGCTGCTCAGCATCTCTGAT   |
| <i>Chick Keratin14</i>              | AGAGCGGCAAGACGGAGATC    | TGCTCCTCCACGCTGGTGAT    |
| <i>Chick AP2<math>\gamma</math></i> | CTCCCGCACCTCTCGGCGGT    | CGAGGTGCGAGTAGGGTTCGC   |
