# Supplementary material
Source: PubMed Central journal article supplement (PMC3494389)
Supplement: cr2012122x15.pdf [file cr2012122x15.pdf]

**Supplementary information, Table S4** Primer sequences (5' → 3') for ChIP assay

| Name              | 5' primers                 | 3' primers              |
|-------------------|----------------------------|-------------------------|
| <i>Id1</i>        | TTCAGACGCTGACACAGACC       | CCTCTTGCAGAAAGGTTCCA    |
| <i>Msx2</i>       | CCGAGTATCTACCTAAATTCCTGCTG | TTCCTTCTAATGGGCCGCTTGTT |
| <i>Id1</i> -3'UTR | TTGGGAAAGCGGGTCACTGGA      | TGGCTCAGCCGGAAGAGGG     |
| <i>AP2γ</i> -P1   | GGGTAGGGCAGTCTCAGGATT      | GAACCCTTGACTTTACCAGGCTC |
| <i>AP2γ</i> -P2   | CTGCGCTTAGTTCTGGAAGCTC     | AATGGGCAAGCACCGGACTTTG  |
| <i>AP2γ</i> -P3   | CAGGCTGCTAGGTAGTTGACTG     | CACCCAAGGCCAAAGAAGTCAGT |
| <i>AP2γ</i> -P4   | TGTGGGTACCCCAAGCCTAAG      | CACTGCTTCTAACTCACCCAC   |
